# Supplementary material for: Expanding the Russian allele frequency reference via cross-laboratory data integration: insights from 7,452 exome samples
Source: bioRxiv or medRxiv preprint supplement (doi:10.1101/2021.11.02.21265801), 2022-09-29
Supplement: Supplementary file [file media-1.pdf]

# Expanding the Russian allele frequency reference via cross-laboratory data integration: insights from 6,096 exome samples

Yury A. Barbitoff<sup>1,3,4,✉</sup>, Darya N. Khmelkova<sup>2</sup>, Ekaterina A. Pomerantseva<sup>2</sup>, Aleksandr V. Slepchenkov<sup>3</sup>, Nikita A. Zubashenko<sup>2</sup>, Irina V. Mironova<sup>2</sup>, Vladimir S. Kaimonov<sup>2</sup>, Dmitrii E. Polev<sup>1</sup>, Victoria V. Tsay<sup>1,5</sup>, Andrey S. Glotov<sup>1,4</sup>, Mikhail V. Aseev<sup>1,4</sup>, Oleg S. Glotov<sup>1,4,5</sup>, Arthur A. Isaev<sup>2</sup>, and Alexander V. Predeus<sup>3,✉</sup>

1 - CerbaLab Ltd., St. Petersburg, Russia

2 - Genetics and Reproductive Medicine Center GENETICO Ltd., Moscow, Russia

3 - Bioinformatics Institute, St. Petersburg, Russia

4 - Dpt. of Genomic Medicine, D.O. Ott Research Institute of Obstetrics, Gynaecology and Reproductology, St. Petersburg, Russia

5 - FGBE "Children's Scientific and Clinical Center for Infectious Diseases of the Federal Medical and Biological Agency", Saint Petersburg, Russia

## Supplementary Information

### Supplementary Figures

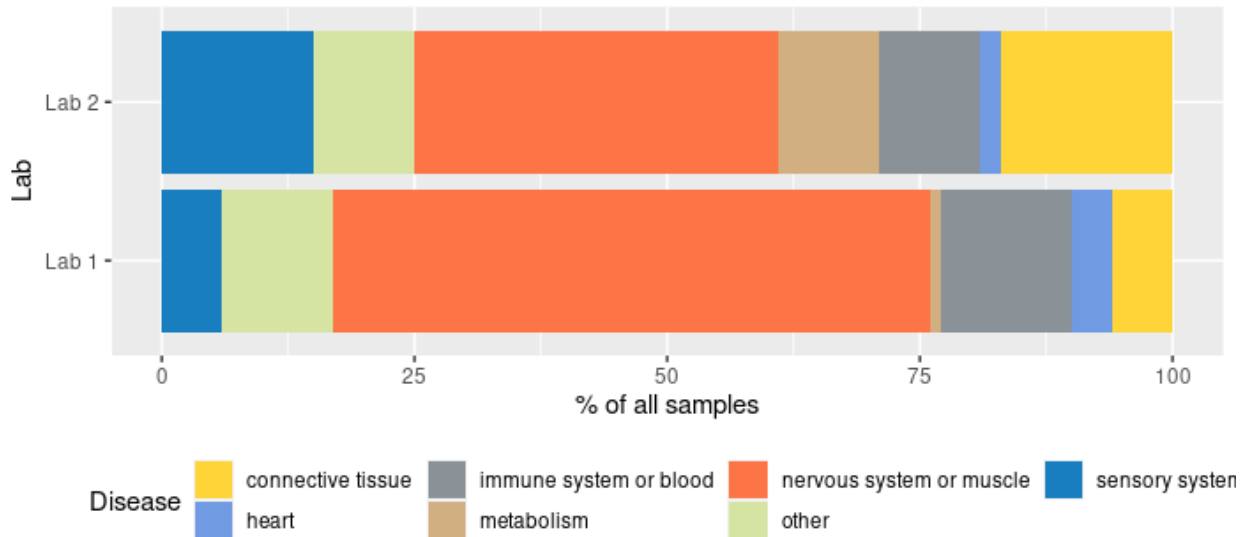

**Figure S1.** Approximate distribution of disease groups in the subset of diseased individuals included into the analysis.

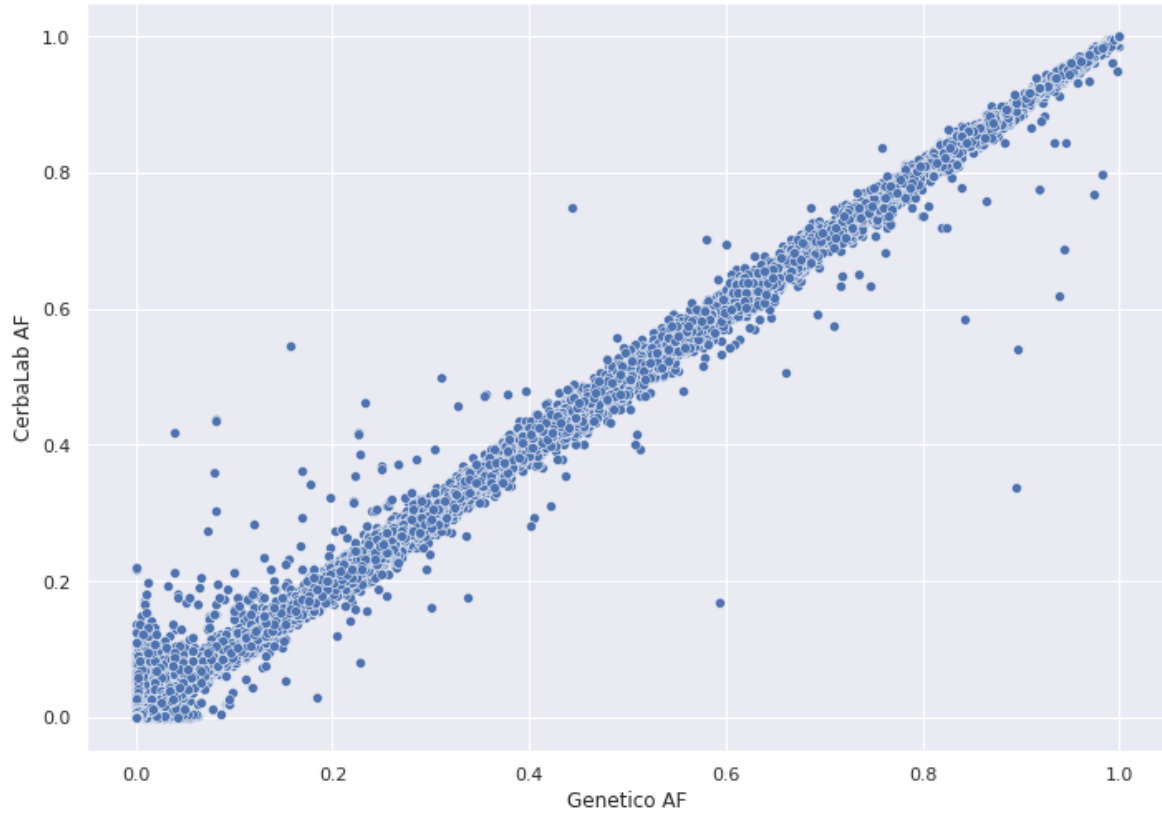

**Figure S2.** A scatterplot showing the correspondence between alternative allele frequencies for variants with call rate greater than 80% in samples from both participating laboratories. Pearson's  $r^2$  for the frequencies is 0.999.

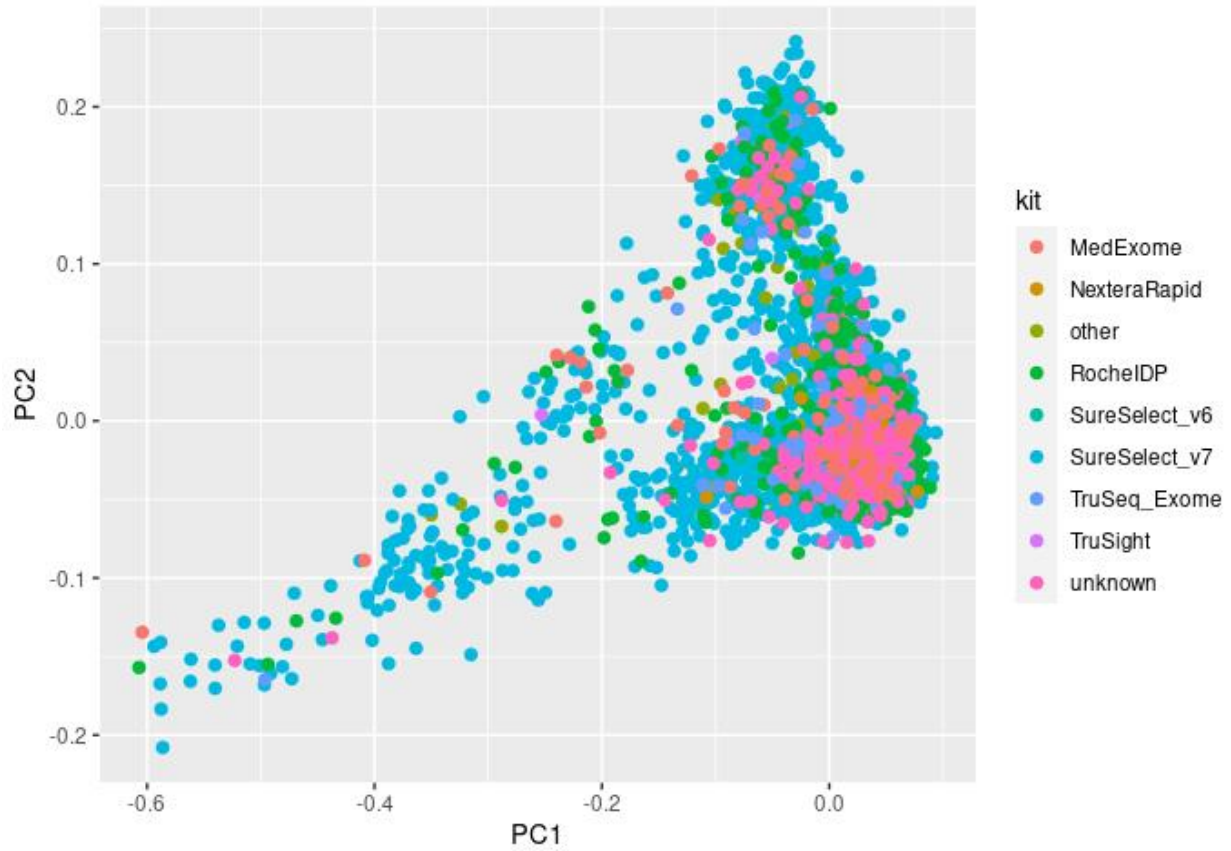

**Figure S3.** A scatterplot showing the results of principal component analysis of individual genotypes coloured by capture probes used for library preparation (A).

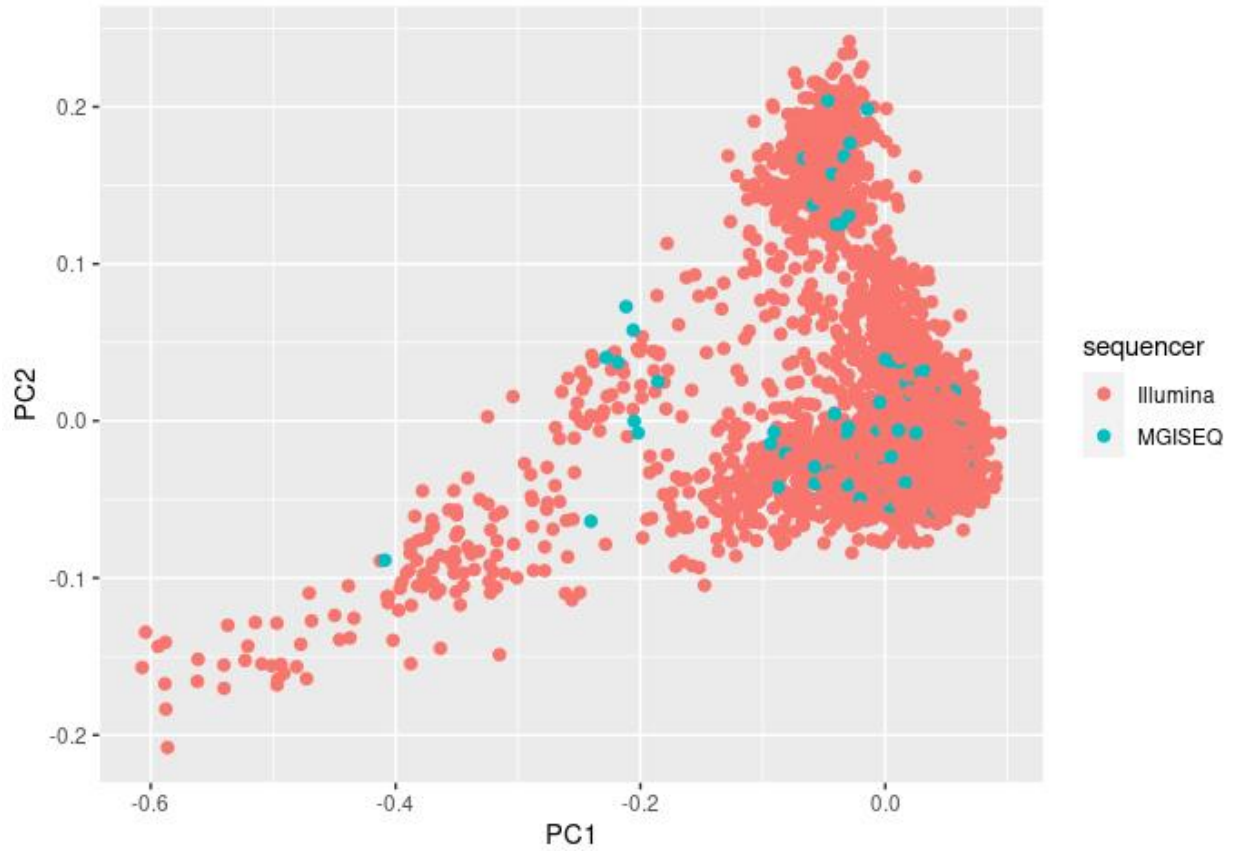

**Figure S4.** A scatterplot showing the results of principal component analysis of individual genotypes coloured by sequencing machine used.
